# Supplementary material for: Multi‐targeting of viral RNAs with synthetic trans‐acting small interfering RNAs enhances plant antiviral resistance
Source: PubMed Central journal article supplement (PMC6899541; doi:10.1111/tpj.14466), 2019-09-16
Supplement: TPJ-100-720-s001.pdf [file TPJ-100-720-s001.pdf]

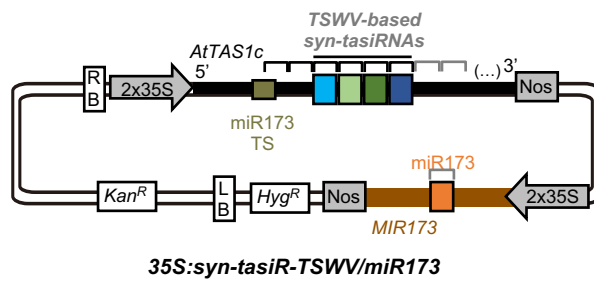

**Figure S1.** Diagram of the complete *35S:syn-tasiR-TSWV/miR173* plasmid. Approximate locations of T-DNA right and left borders (RB and LB, respectively) as well as bacterial and plant antibiotic resistance genes (kanamycin and hygromycin, respectively) are indicated. Other details are described in Figure 1a.
