# Supplementary material for: Multi‐targeting of viral RNAs with synthetic trans‐acting small interfering RNAs enhances plant antiviral resistance
Source: PubMed Central journal article supplement (PMC6899541; doi:10.1111/tpj.14466), 2019-09-16
Supplement: TPJ-100-720-s003.pdf [file TPJ-100-720-s003.pdf]

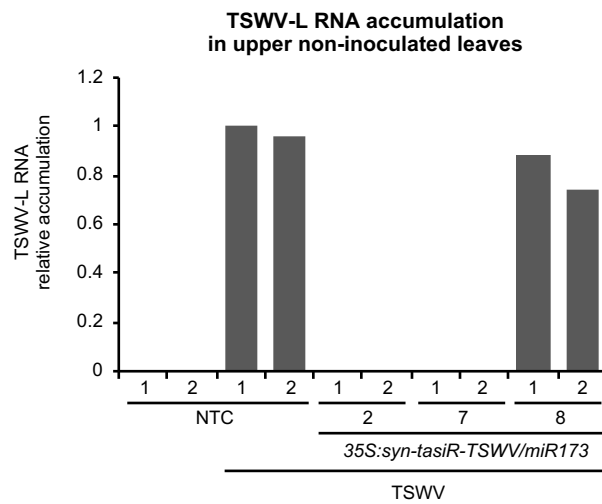

**Figure S3.** Relative TSWV-L RNA accumulation at 40 dpi in selected *syn-tasiRNA* lines and non-transgenic controls (NTCs) after normalization to *Solanum lycopersicum* actin (*Tom41*) and *Elongation Factor 1 alpha* (*eEF1a*), as determined by RT-qPCR (NTC infected plant 1 = 1.0).
