# Supplementary material for: Multi‐targeting of viral RNAs with synthetic trans‐acting small interfering RNAs enhances plant antiviral resistance
Source: PubMed Central journal article supplement (PMC6899541; doi:10.1111/tpj.14466), 2019-09-16
Supplement: TPJ-100-720-s004.pdf [file TPJ-100-720-s004.pdf]

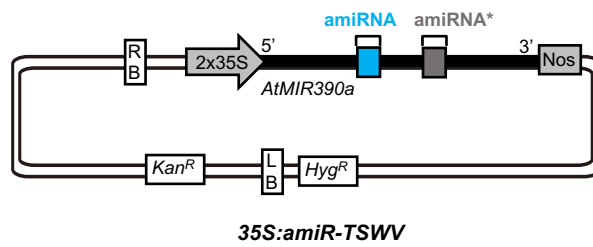

**Figure S4.** Diagram of the complete 35S:amiR-TSWV plasmid. Other details are described in Figure 4a and Supporting Figure S1.
